# Supplementary material for: HMG-CoA Reductase Inhibitors Relieve Endoplasmic Reticulum Stress by Autophagy Inhibition in Rats With Permanent Brain Ischemia
Source: PubMed Central journal article supplement (PMC6018104; doi:10.3389/fnins.2018.00405), 2018-06-19

Supplementary Figure (Original Figures)

VE-cadherin

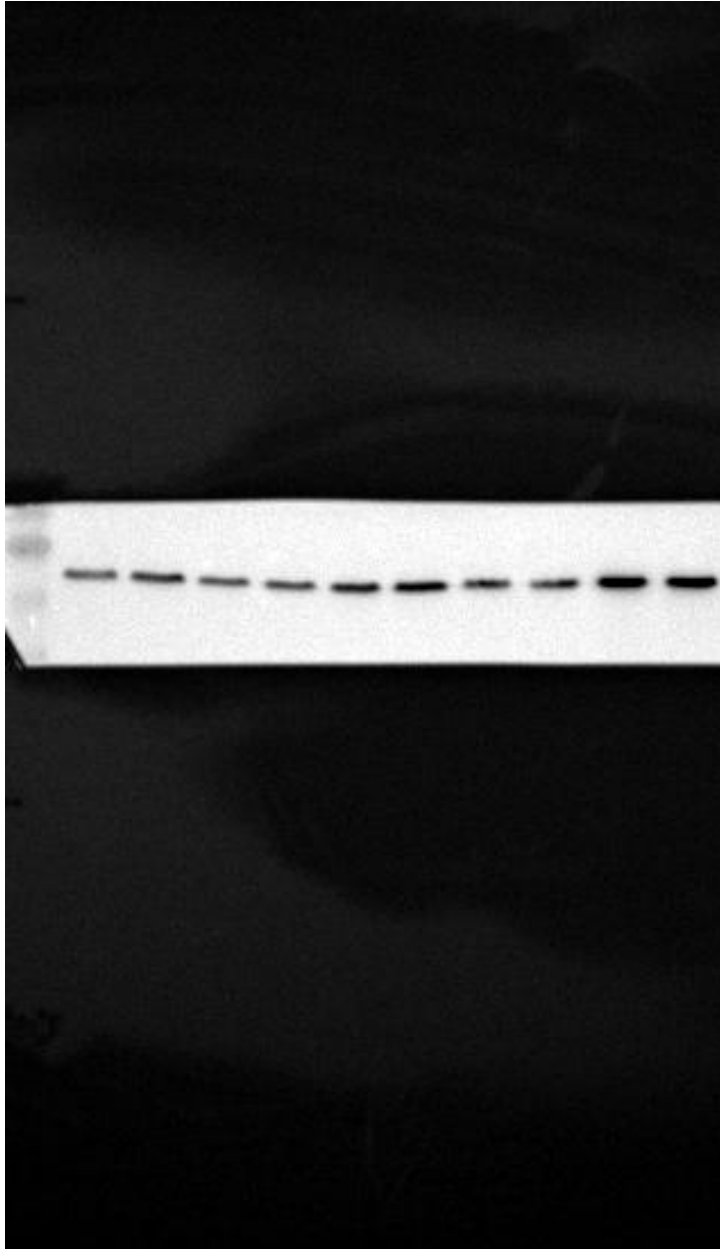

CD34

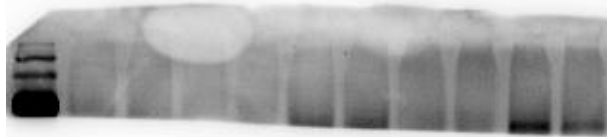

pmTOR

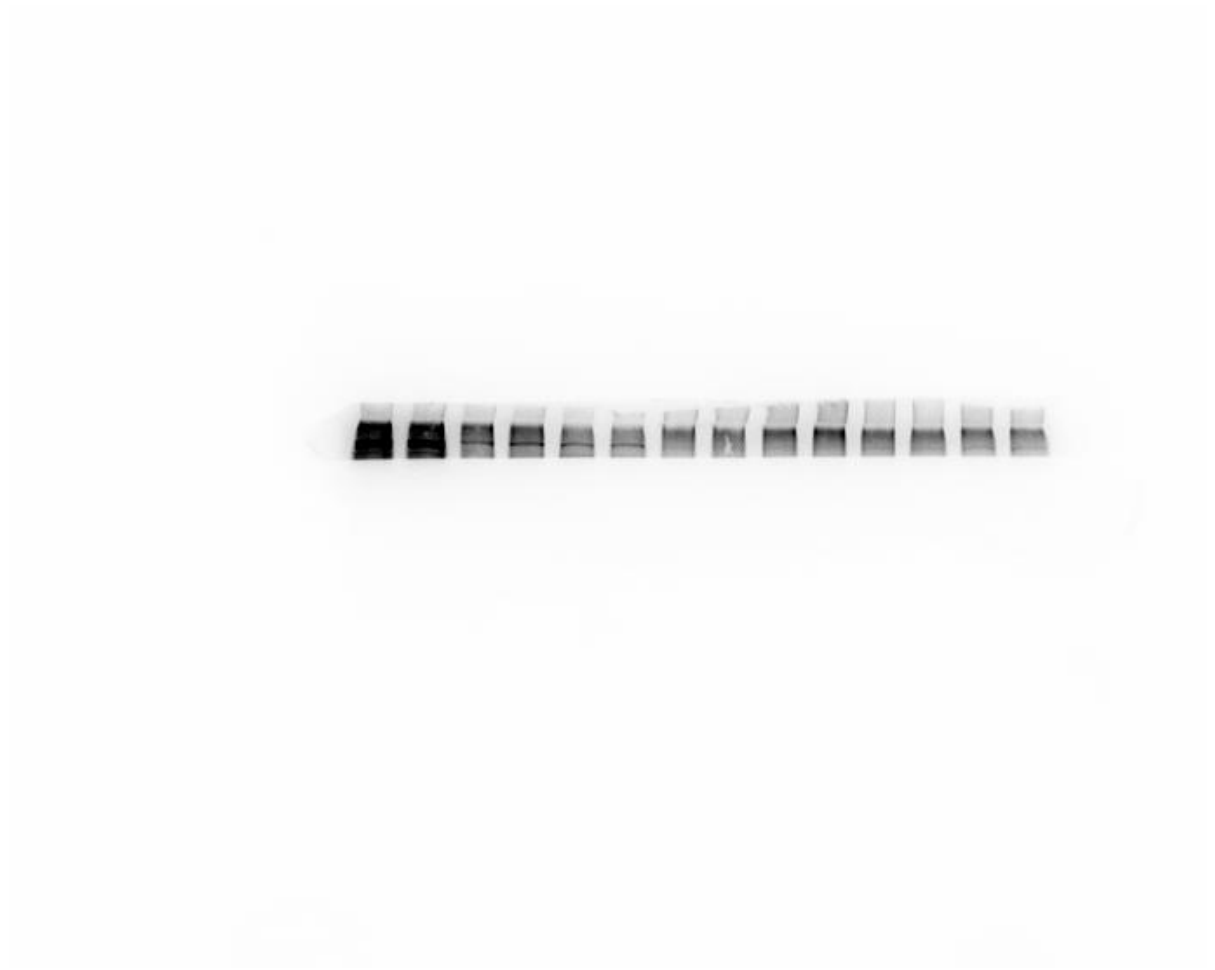

$\beta$ -actin

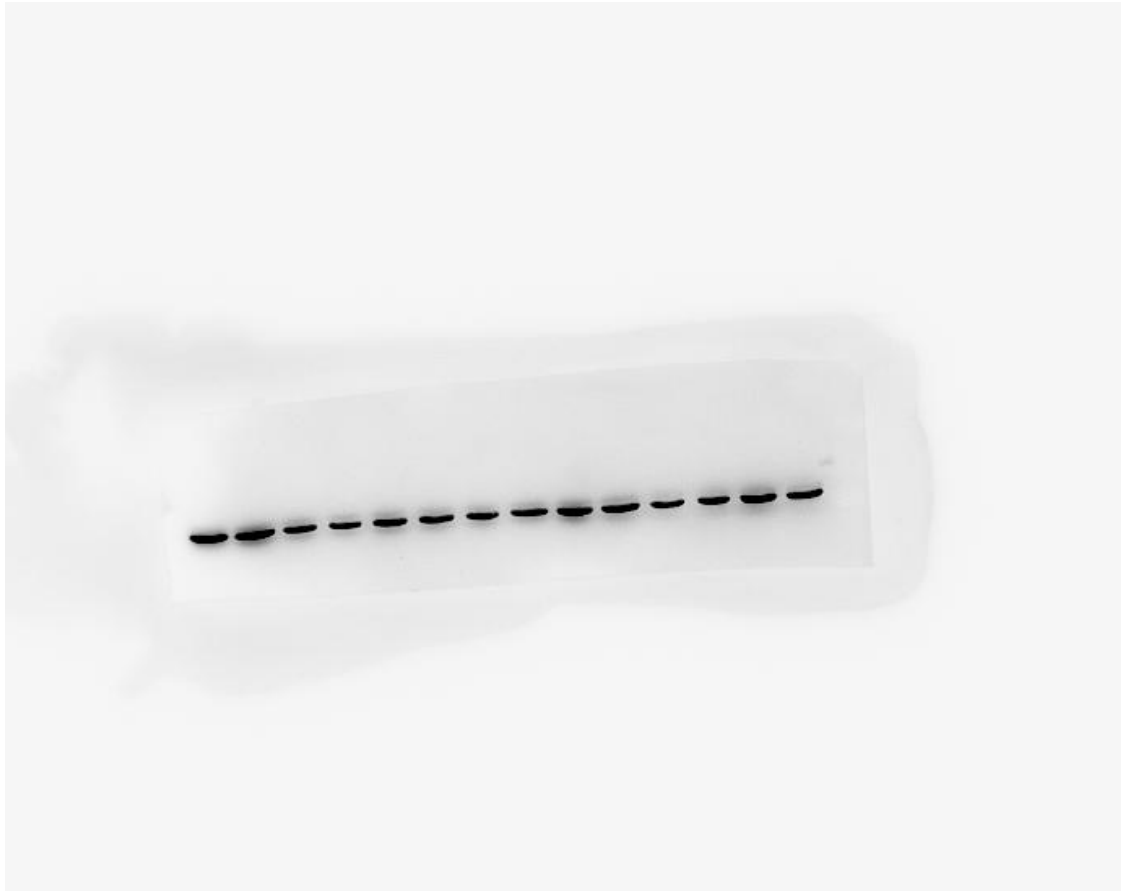

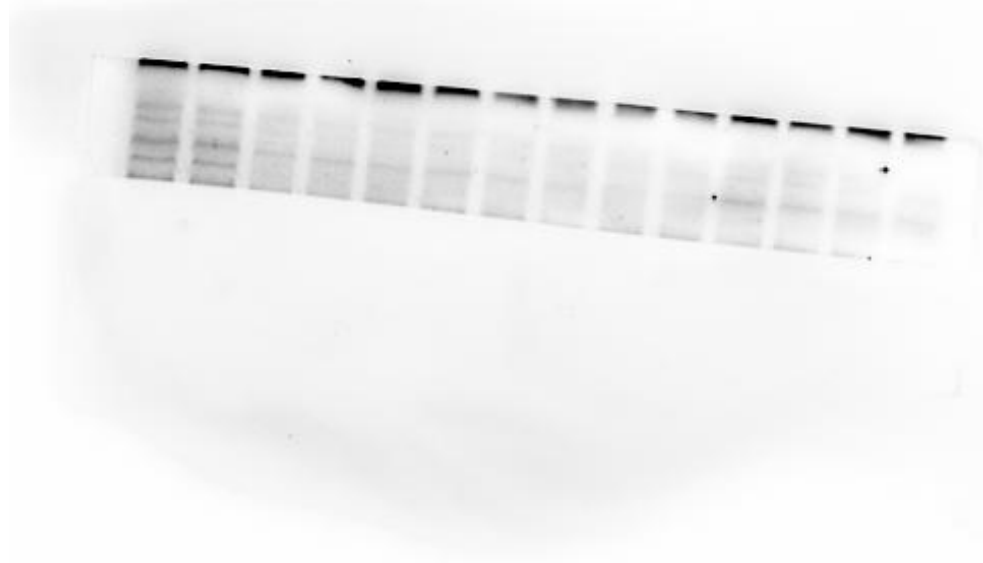

LC3B

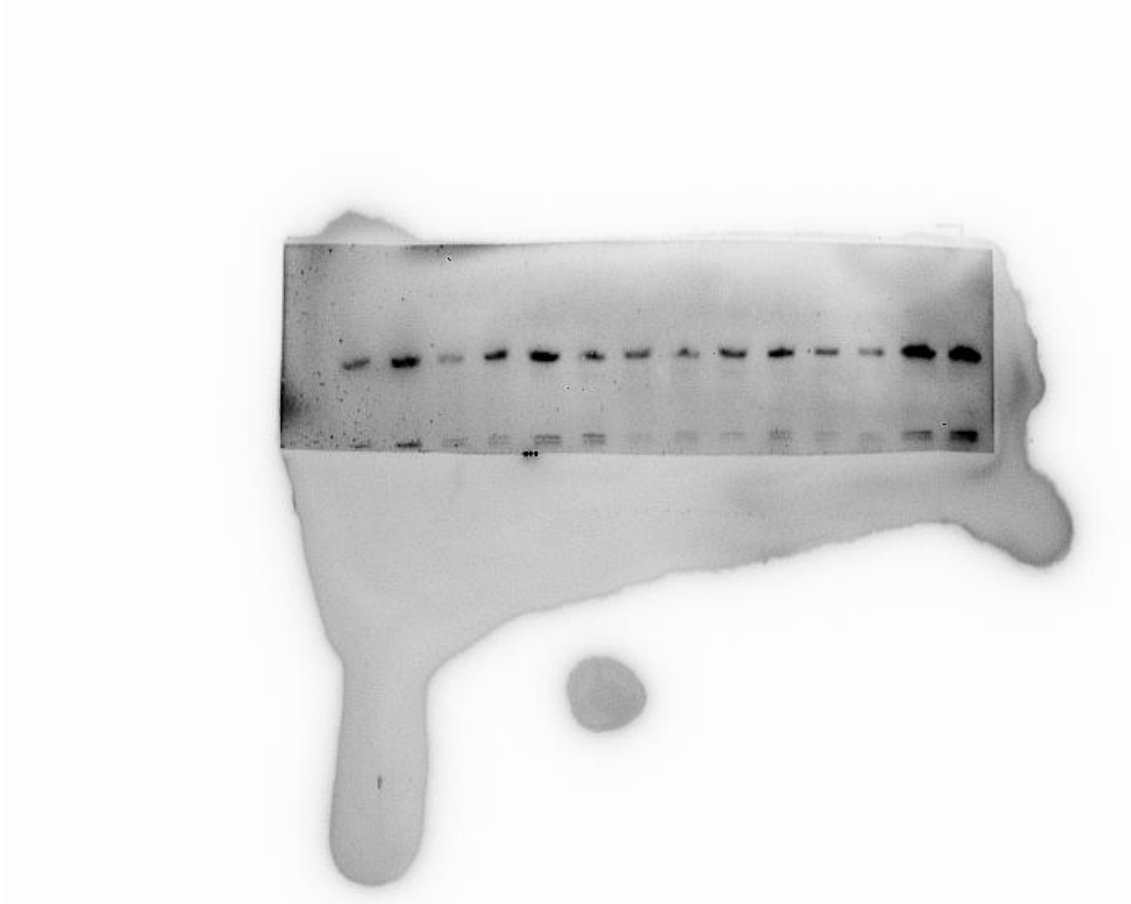

HIF1a

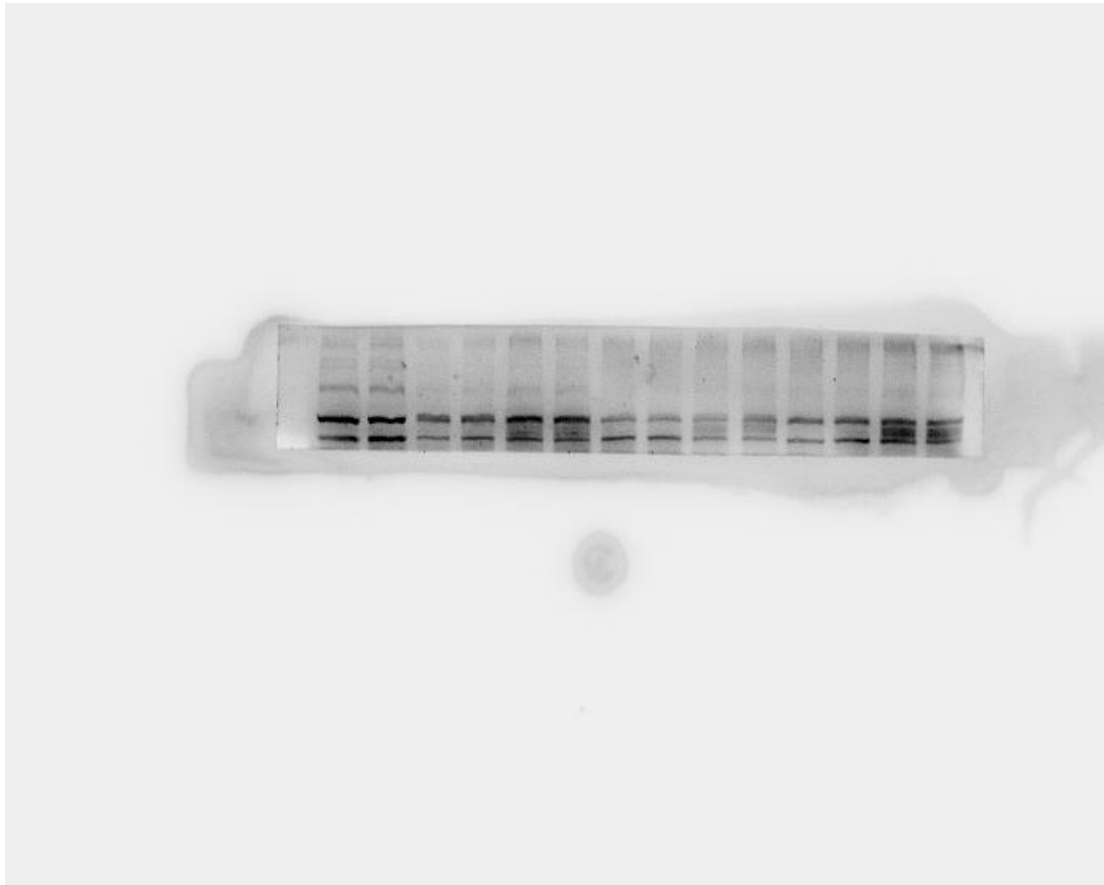

$\beta$ -actin (Upper for Figure 5E, below for Figure 6A)

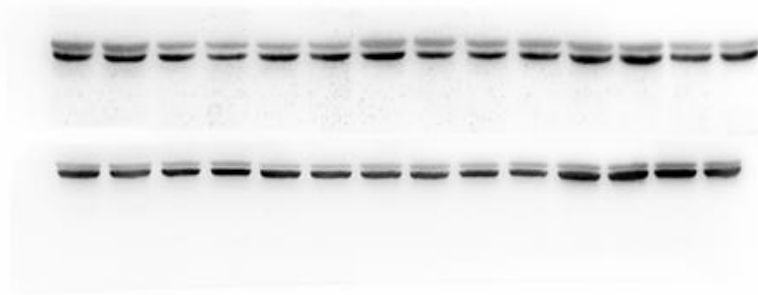



p-PERK

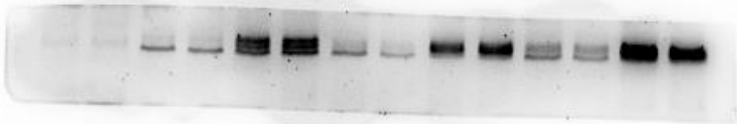

ATF4

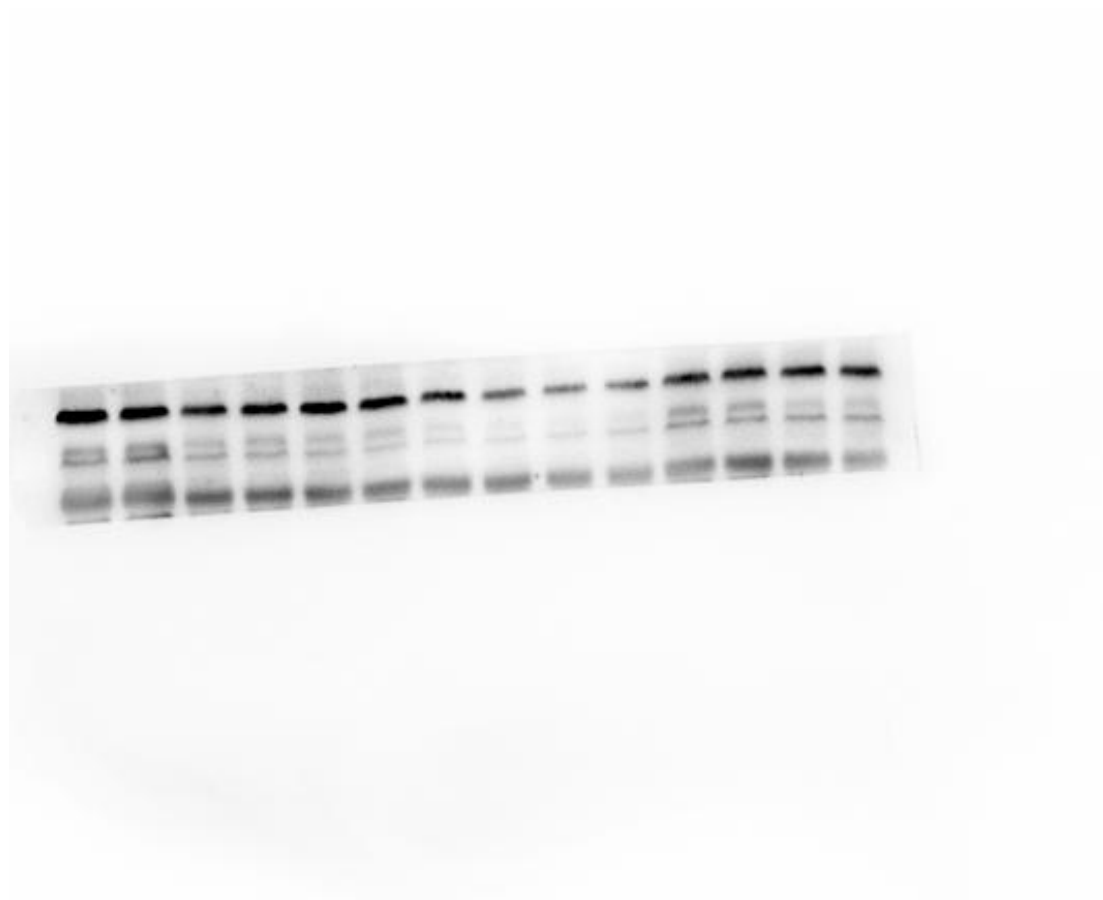

peIF2a

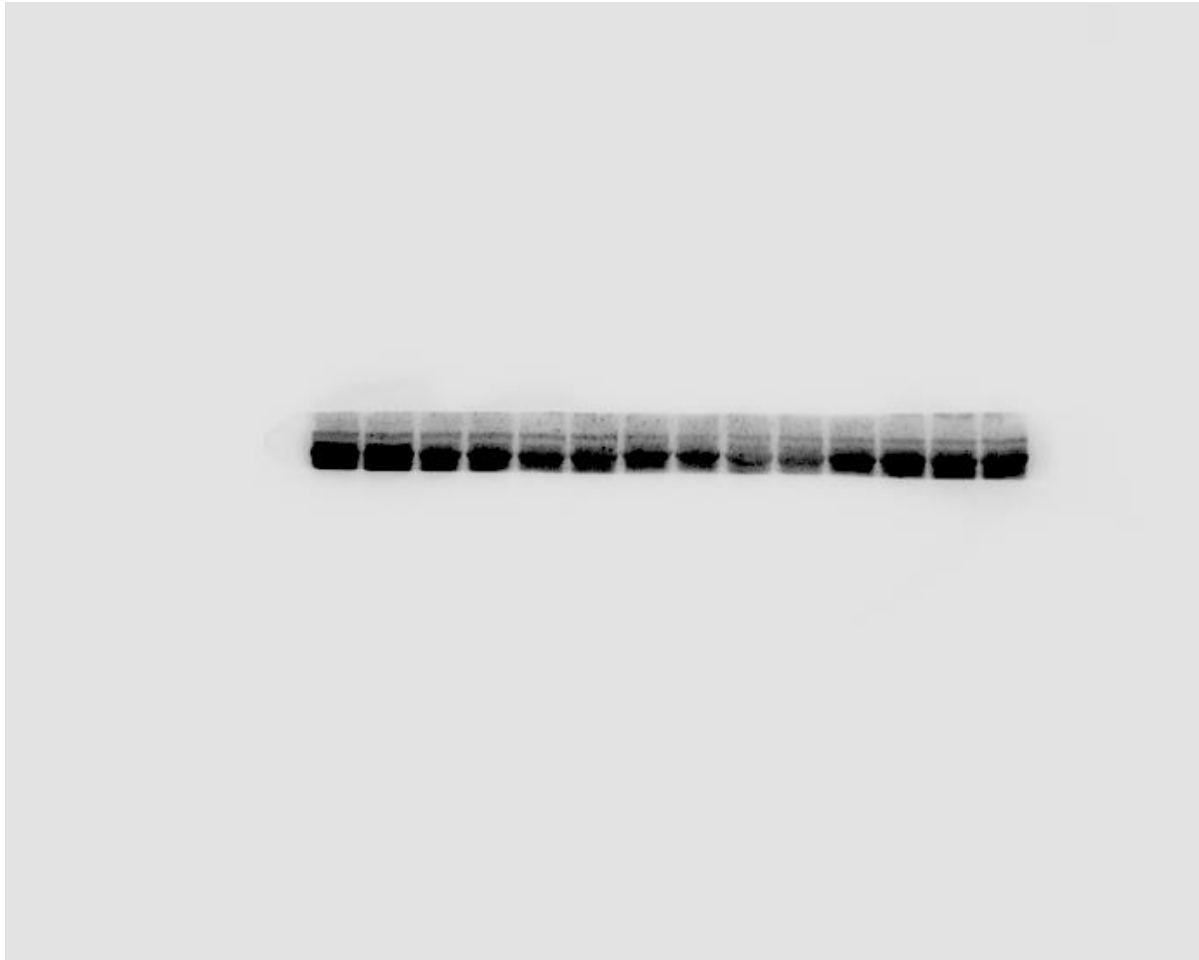

CHOP

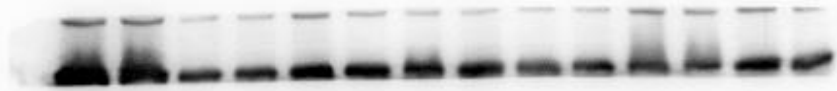

IRE1-a

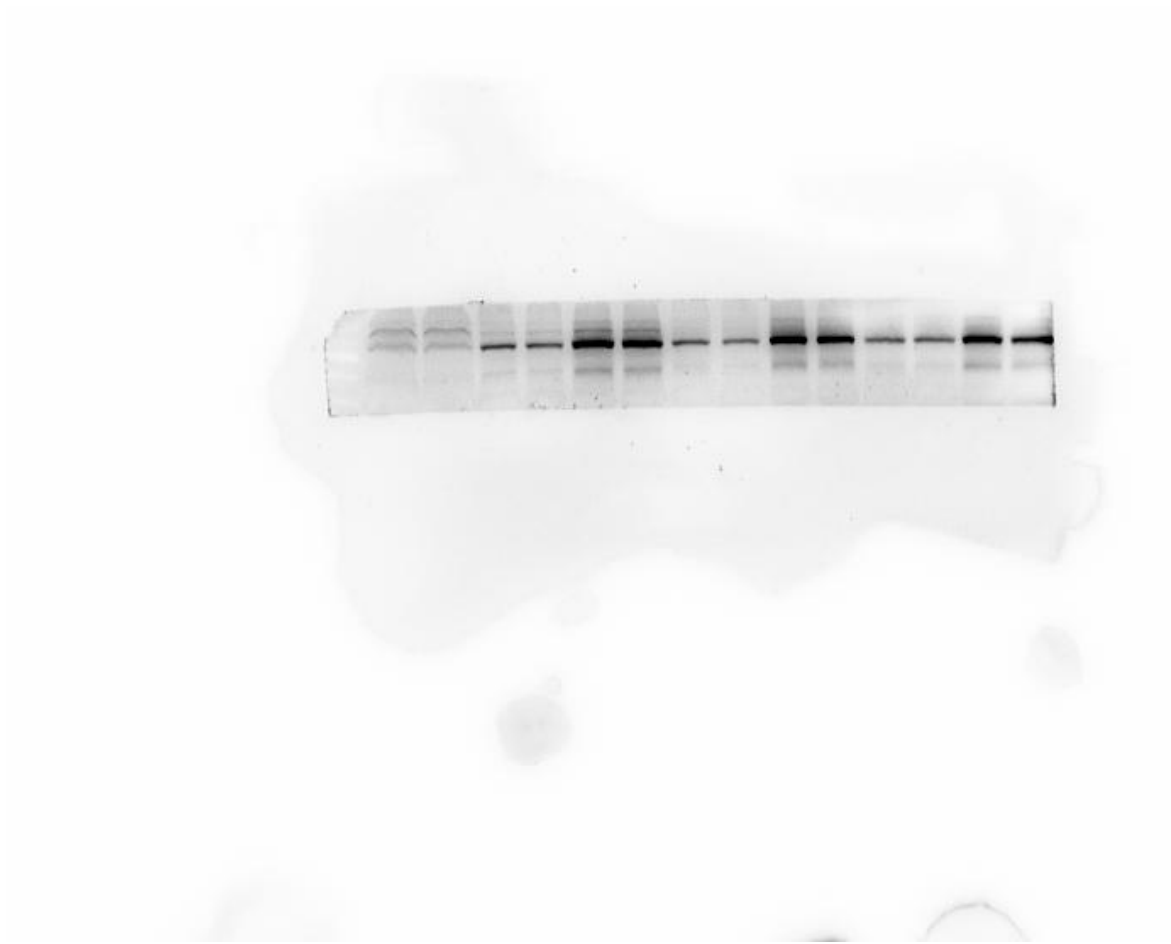

pNF-KB

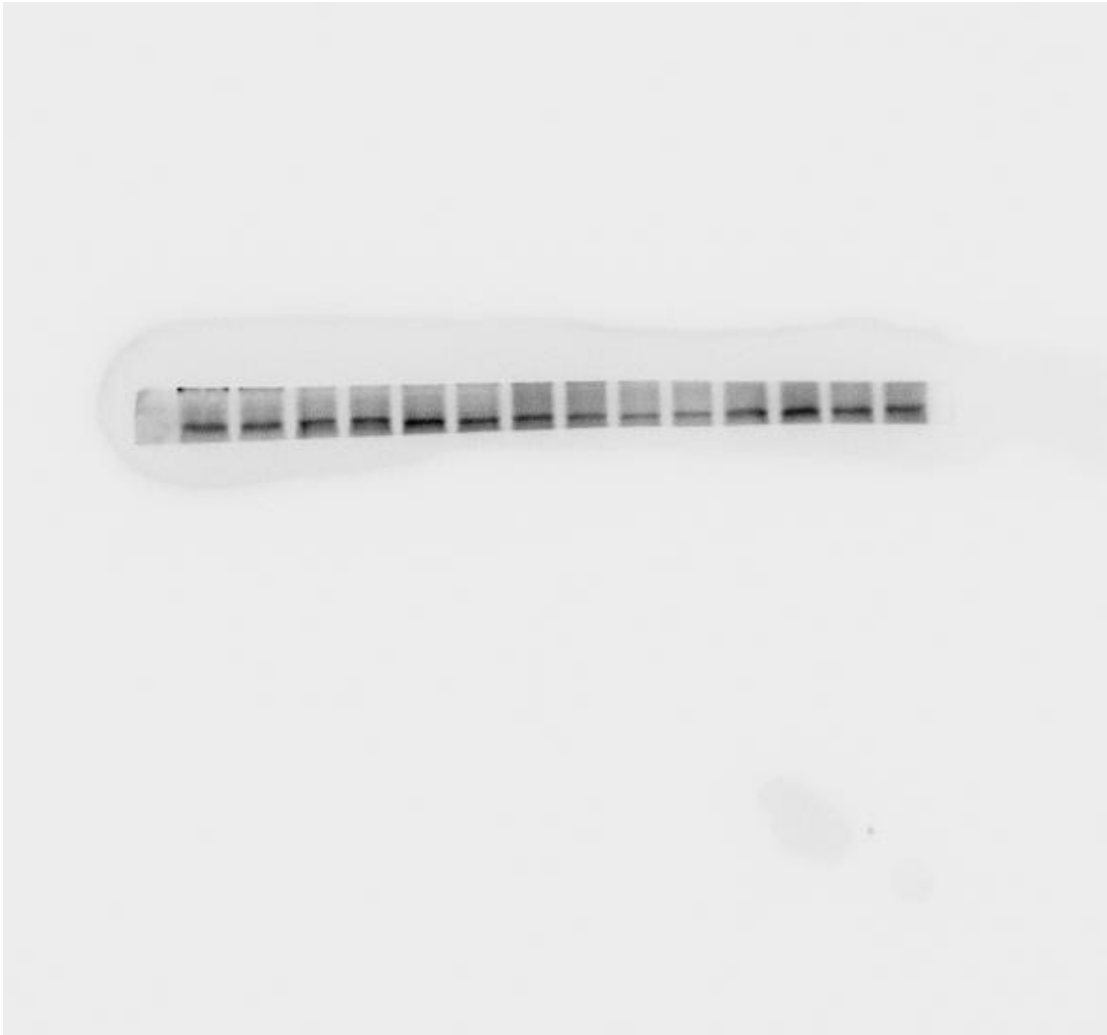

pJNK

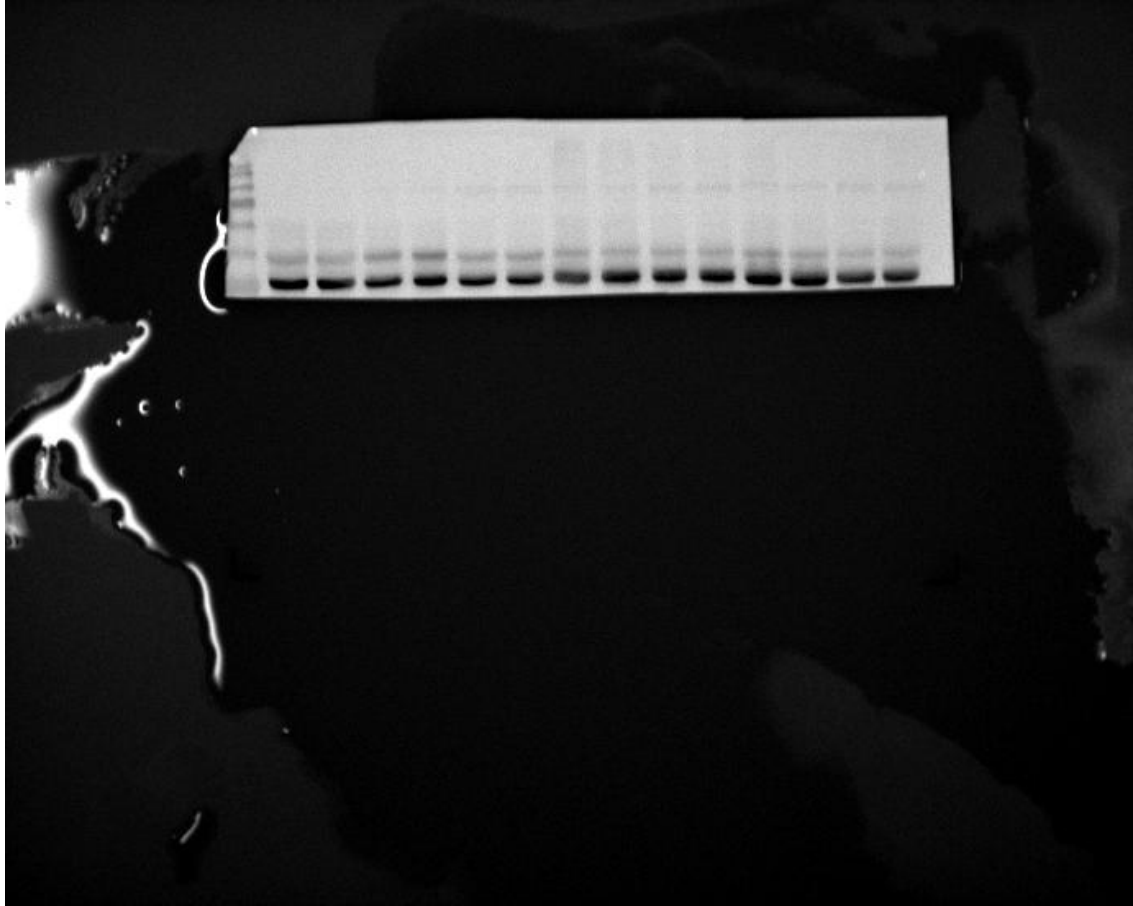

pP38

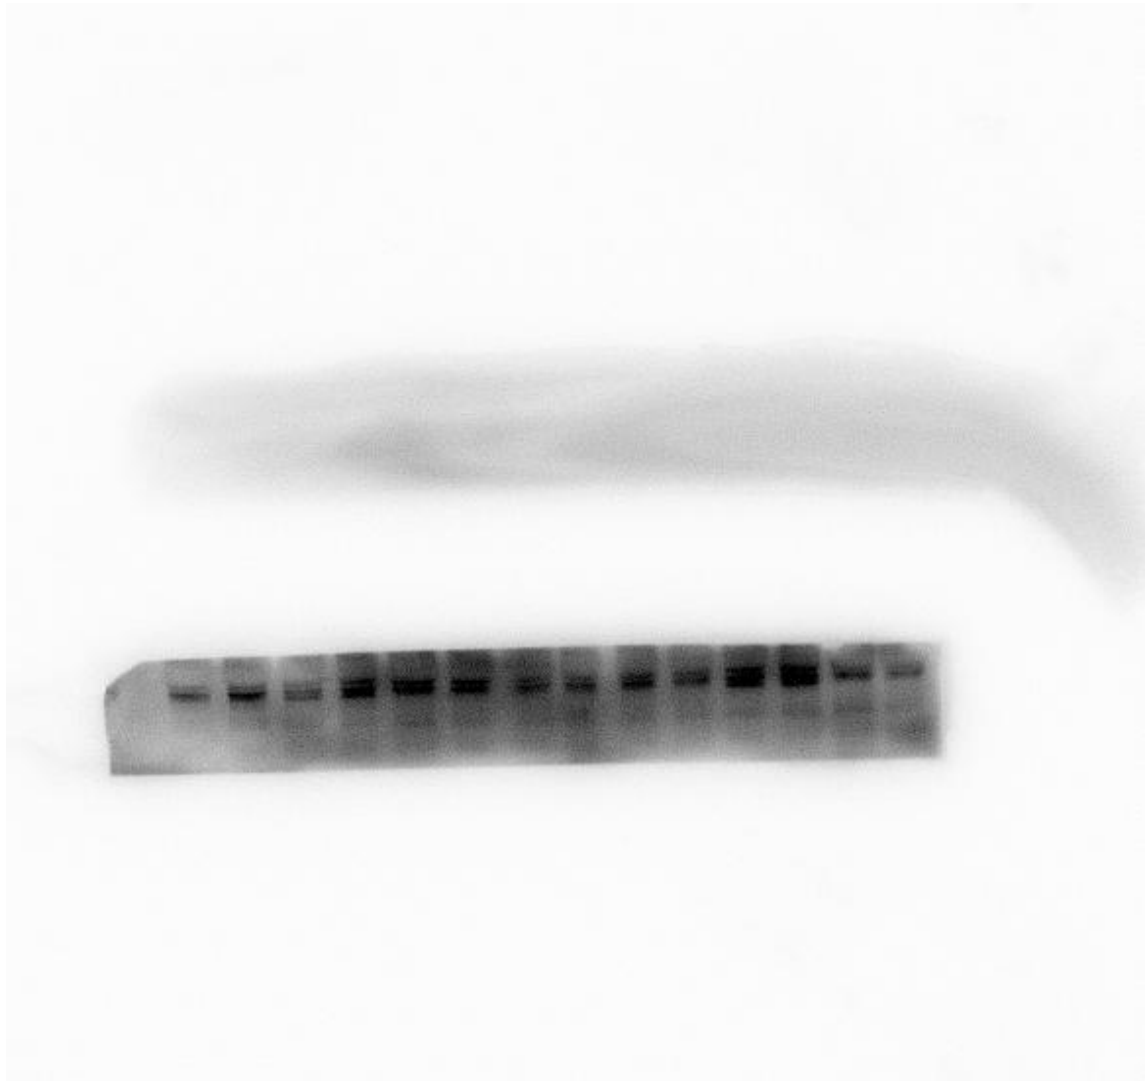



$\beta$ -actin

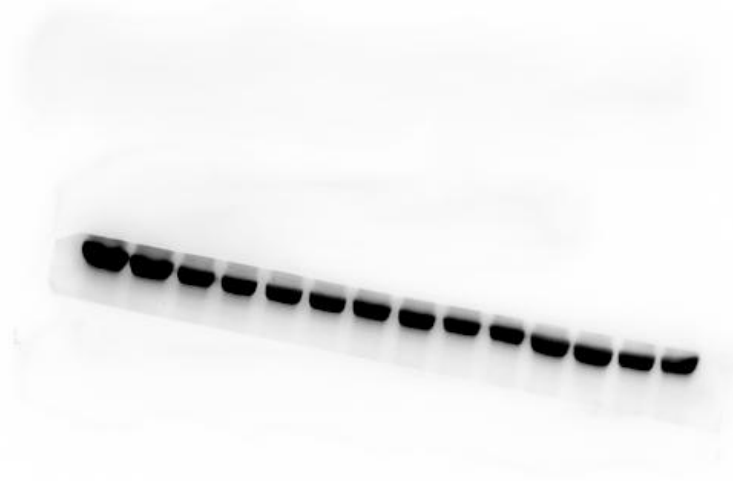

Bip

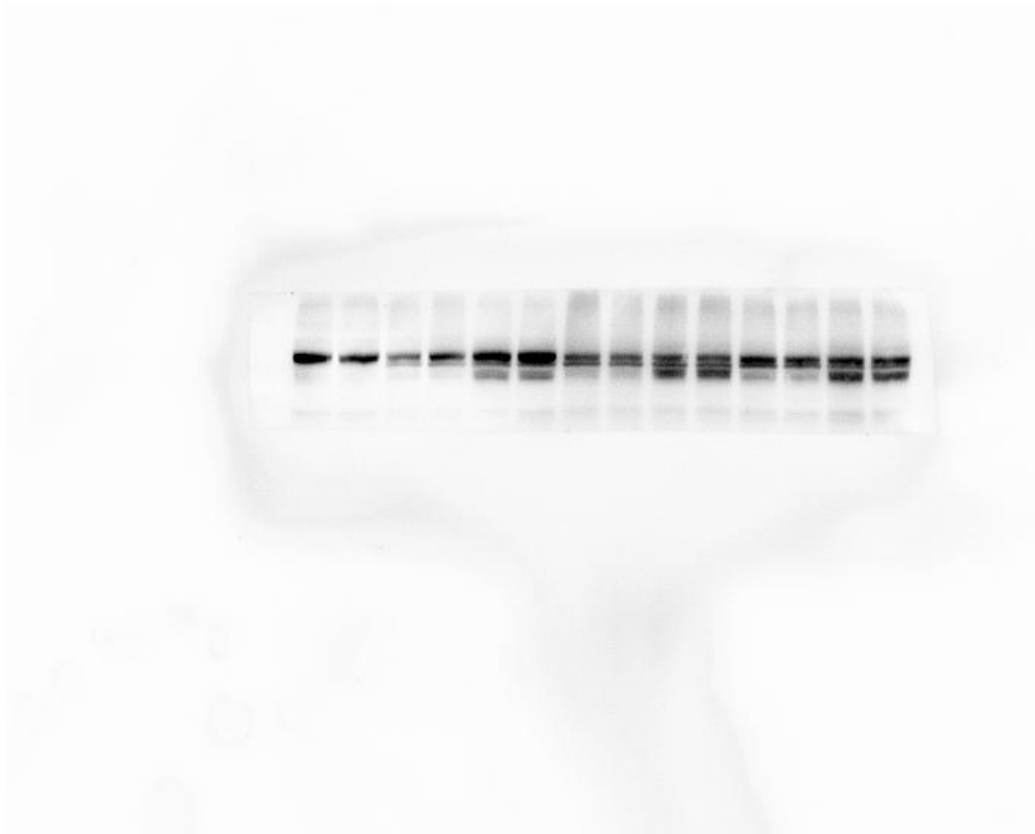

# Calnexin

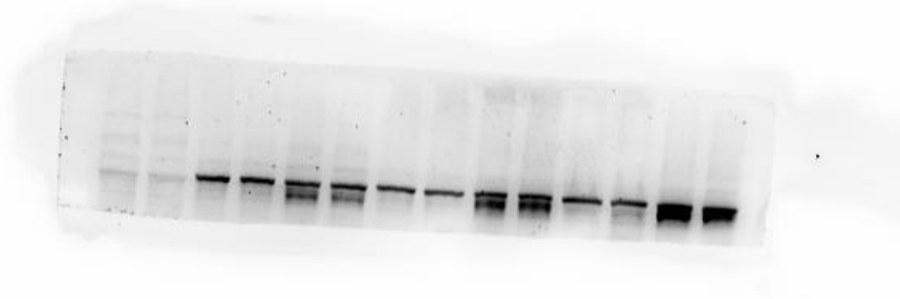

Ero1a

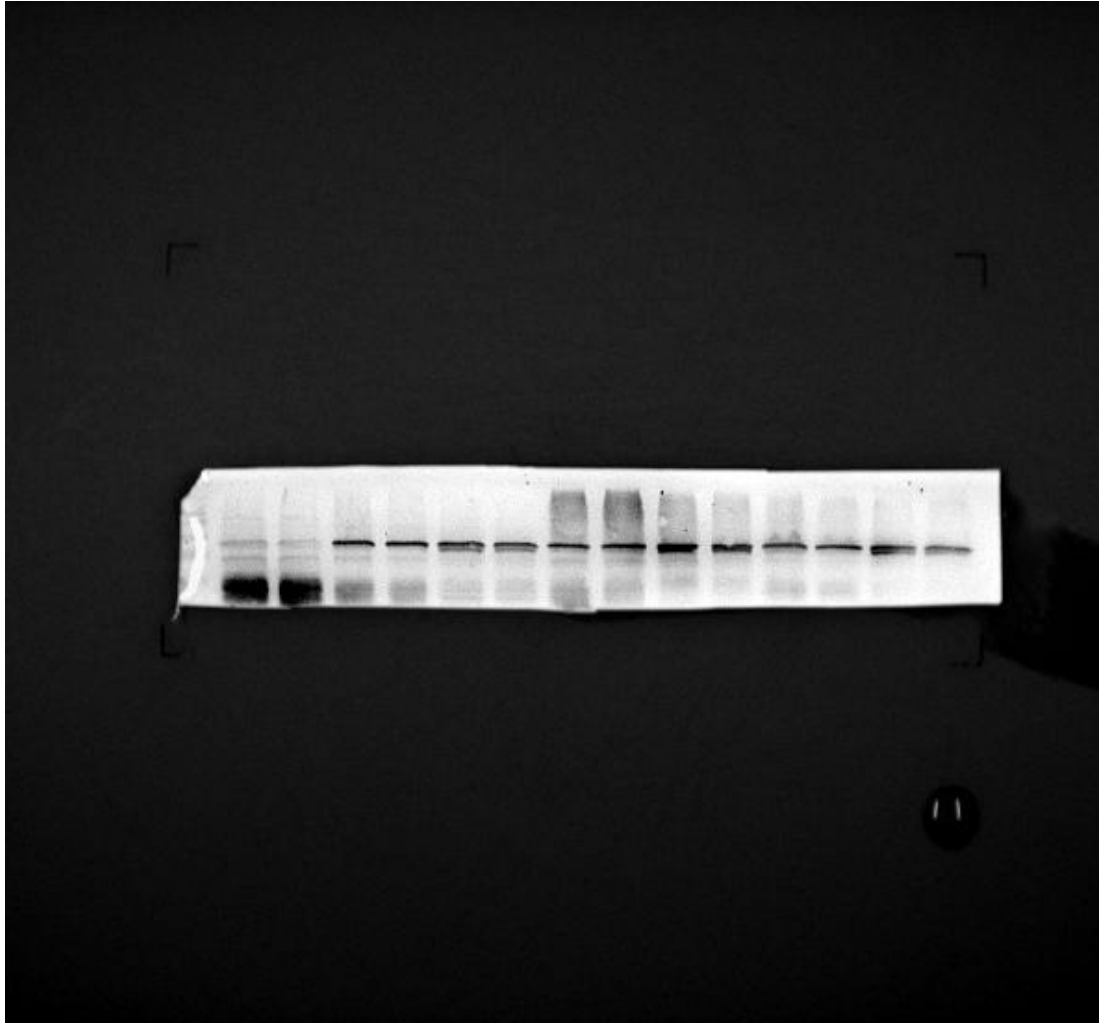

Nrf-2 (upper) and  $\beta$ -actin (bottom)

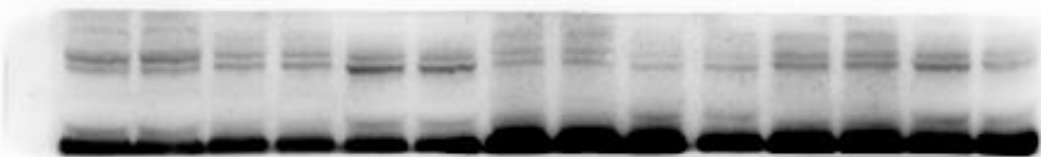

ATF-6

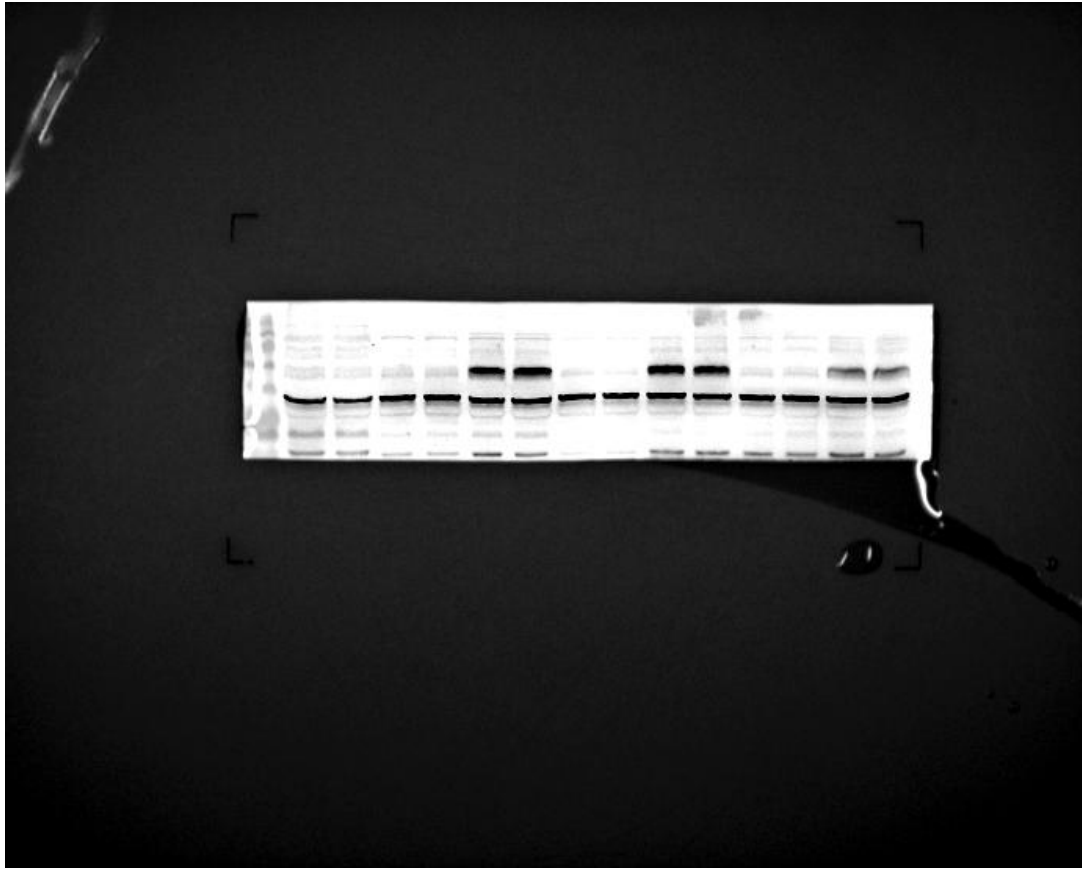

$\beta$ -actin

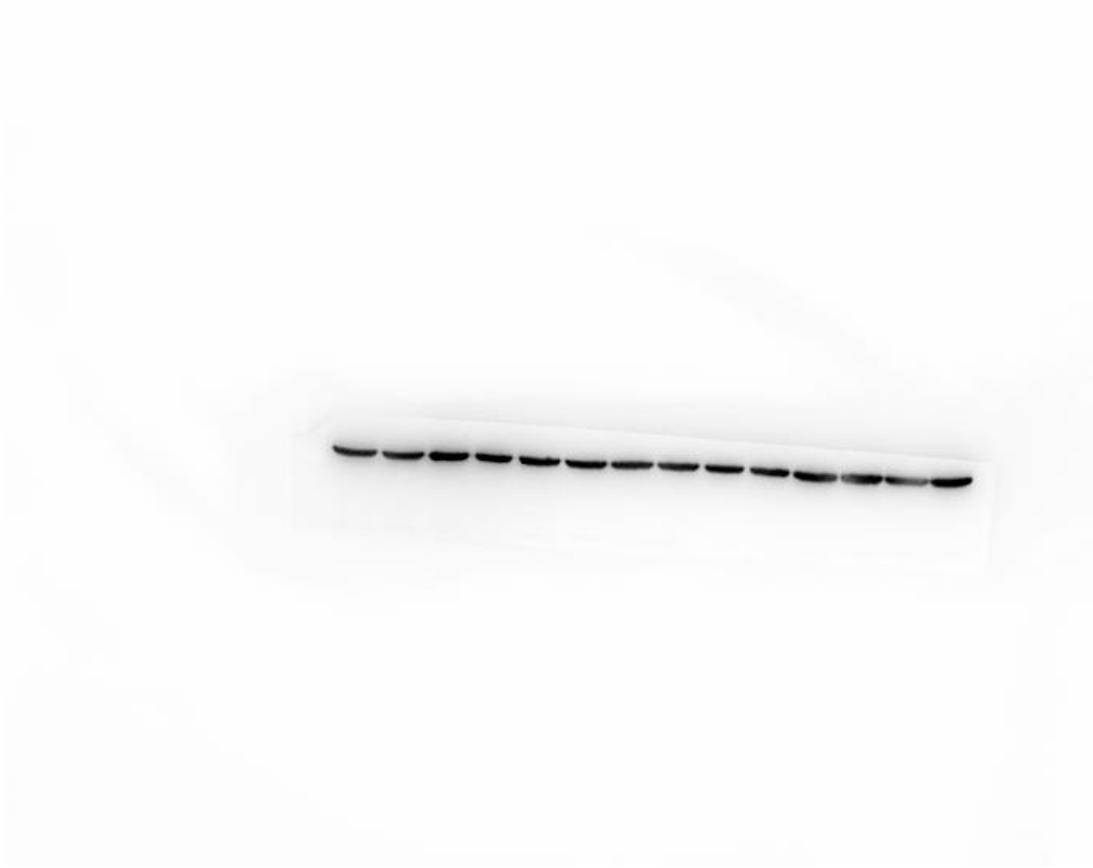

Cleaved-caspase 3

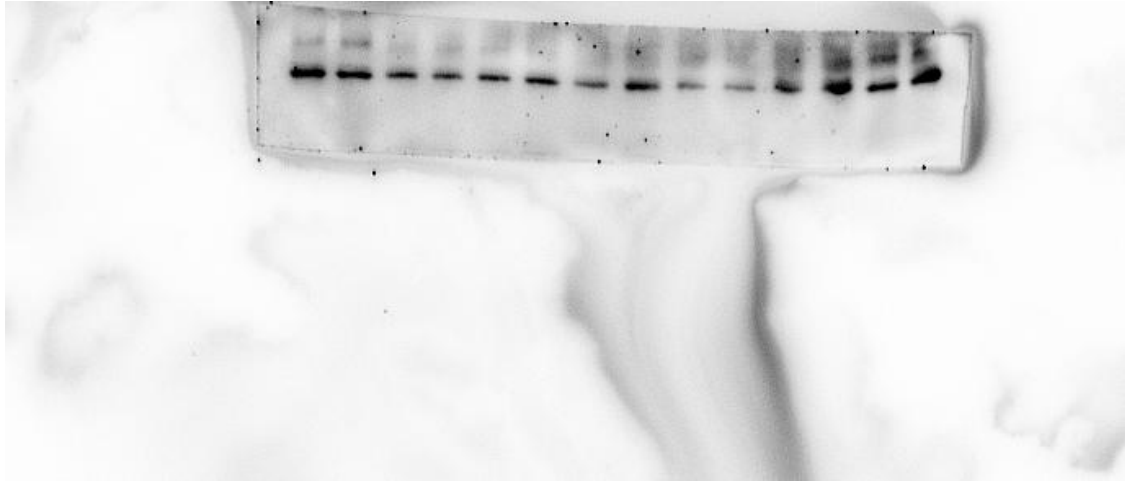



Bcl-2

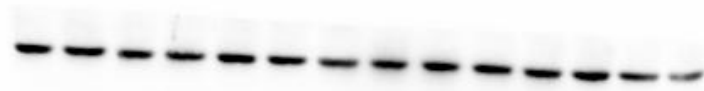

$\beta$ -actin

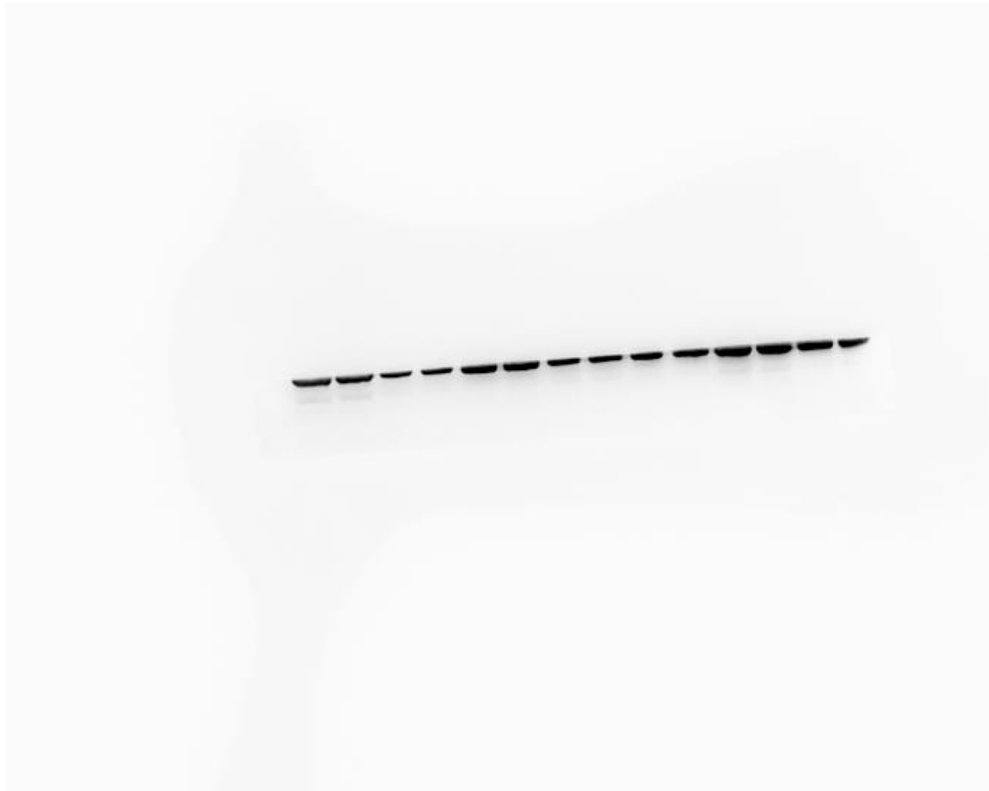

Supplement: Data_Sheet_1.pdf [file Data_Sheet_1.pdf]
